# Supplementary material for: Enhanced lipid metabolism serves as a metabolic vulnerability to a polyunsaturated fatty acid (PUFA)-rich diet in glioblastoma
Source: Research Square preprint supplement (doi:10.21203/rs.3.rs-6355361/v1), 2025-06-24
Supplement: Supplementary file 1 [file 30e3226621d441e080d7cd2e.xlsx]

## Sheet: Fig.1 B&C&D
Days Survival	Mouse	Diet	Treatment		Ketone	Glucose
17	#1	Standard Diet			0.6	289
16	#2				0.6	252
17	#3				0.6	163
17	#4				0.7	166
16	#1				0.4	183
20	#2				0.5	142
18	#3
19	#4
25	#1	Ketogenic Diet			1.2	152
50	#2			Leak
22	#3				1.6	173
20	#4				3.6	148
22	#1				2.9	185
19	#2				3.4	137
18	#3				1.4	173
23	#4
24	#1	Srandard Diet	Radiation
23	#2
24	#3
25	#4
21	#1
21	#2
27	#3
25	#4
30	#1	Ketogenic Diet
34	#2
27	#3
39	#4
33	#1
33	#2
39	#3
39	#4

## Sheet: Fig. 1E
		Days Survival
SD+hfRT	#1	31
	#2	44
	#3	31
	#4	30
	#5	43
KD+hfRT	#1	64
	#2	34
	#3	64
	#4	57

## Sheet: 2A&B
		1	2	3	4	5	6	7	8	9	10	11	12	13	14
		Regular diet	Regular diet	Regular diet	Regular diet	Regular diet	Regular diet	Regular diet	Ketogenic diet	Ketogenic diet	Ketogenic diet	Ketogenic diet	Ketogenic diet	Ketogenic diet	Ketogenic diet
aminoacids	Met	12.5	13.3	10.8	23.5	16.6	15.8	13.2	16.1	25.4	26.6	17.2	28.8	30.6	23.4
aminoacids	His	31.4	39.3	29.9	48.8	32	33.9	19.1	49.7	48.8	50.7	44.5	34.8	73.2	53.4
aminoacids	Tyr	13.4	30.5	18.4	29.8	17.8	18.1	11.3	20.4	31	28.2	22.8	36.2	34.4	31.3
aminoacids	Asn	22.5	25.9	26.9	48.1	21.5	28.5	16.1	44.8	47.6	32.3	28.4	38.7	55.6	36.7
aminoacids related	Betaine	0.0001	7.53	2.5	3.49	3.62	2.91	0.0001	8.07	14.1	4.6	5.46	15.3	10.2	20.7
aminoacids related	Met-SO	0.212	0.229	0.224	0.317	0.221	0.216	0.181	0.227	0.371	0.336	0.228	0.325	0.357	0.319
aminoacids related	Orn	3.61	2.75	3.62	4.7	2.75	3.66	1.6	5.16	6.15	8.69	4.2	4.35	4.4	7.16
aminoacids related	ADMA	0.268	0.514	0.413	0.789	0.259	0.515	0.18	0.827	1.19	0.581	0.636	0.371	0.981	1.09
aminoacids related	Sarcosine	0.548	0.698	0.684	0.518	0.465	0.843	0.081	1.25	0.758	0.848	0.519	0.833	1.29	1.65
aminoacids related	3-Met-His	0.455	0.842	0.66	0.82	0.455	0.675	0.186	0.979	1.1	0.619	0.633	0.87	1.01	0.919
biogenic amines	Spermidine	9.06	9.27	10.9	8.61	6.18	7.15	5.67	3.31	2.78	6.08	9.93	5.41	2.4	4.67
ceramides	Cer(d18:1/16:0)	0.144	0.215	0.148	0.209	0.101	0.17	0.064	0.594	0.514	0.151	0.217	0.283	0.402	0.638
ceramides	Cer(d18:2/16:0)	0.052	0.072	0.057	0.075	0.053	0.118	0.028	0.105	0.112	0.077	0.116	0.104	0.09	0.112
ceramides	Cer(d18:1/20:0(OH))	1.72	1.22	1.57	2.04	1.8	1.55	1.44	2.1	1.96	1.56	1.39	1.58	2.38	2.43
diacylglycerols	DG(18:0_20:4)	0.247	0.157	0.16	0.205	0.387	0.186	0.339	0.071	0.109	0.303	0.153	0.112	0.139	0.125
diacylglycerols	DG(17:0_18:1)	0.815	1.02	0.915	0.633	0.802	0.965	0.821	0.779	0.566	0.609	0.97	0.75	0.572	0.56
fatty acids	AA	31.7	29.9	15.8	16	33.2	19.8	41.1	11.6	12.3	24.8	18.6	16.2	9.78	7.7
fatty acids	DHA	8.63	14.1	6.16	10.6	13.1	8.67	11.3	6.33	5.92	9.69	7.89	7.23	7.08	5.58
glycerophospholipids	PC ae C34:0	1.79	1.97	1.68	1.62	2.05	1.84	1.85	2.35	2.12	2.09	2.49	2.62	2.32	2.72
glycerophospholipids	PC ae C38:4	0.929	0.976	0.809	1.12	0.947	0.993	0.954	1.85	1.64	1.21	1.26	1.39	1.44	1.75
glycerophospholipids	PC ae C40:6	0.415	0.464	0.378	0.513	0.499	0.469	0.432	0.842	0.693	0.589	0.586	0.643	0.609	0.844
glycerophospholipids	PC ae C38:6	0.482	0.68	0.444	0.679	0.647	0.625	0.484	1.07	0.915	0.788	0.728	0.788	0.76	0.964
glycerophospholipids	PC ae C32:1	1.56	1.66	1.3	1.89	1.68	1.64	1.9	2.92	2.28	1.85	1.99	1.98	2.02	2.91
glycerophospholipids	PC ae C36:4	1.23	1.37	1.02	1.57	1.38	1.27	0.976	1.98	1.94	1.55	1.51	1.7	1.67	2
glycerophospholipids	PC ae C38:5	0.876	1.07	0.812	1.35	0.817	0.931	0.669	2.29	2.07	1.15	1.33	1.48	1.71	2.17
glycerophospholipids	PC ae C40:4	0.313	0.282	0.274	0.388	0.298	0.304	0.296	0.524	0.466	0.319	0.379	0.386	0.482	0.572
glycerophospholipids	PC ae C40:5	0.321	0.35	0.288	0.481	0.288	0.337	0.328	1.02	0.785	0.4	0.465	0.493	0.675	0.938
glycerophospholipids	PC ae C36:5	0.512	0.609	0.478	0.638	0.622	0.589	0.67	1.2	0.897	0.644	0.687	0.6	0.713	1.03
glycerophospholipids	PC aa C30:0	6.13	7.02	6.25	8.76	3.91	6.47	2.98	9.97	11.4	4.57	7.74	10.3	10.5	14.3
glycerophospholipids	PC aa C36:0	1.26	0.765	0.915	0.943	0.685	0.658	0.927	1.99	1.51	1.1	1.22	0.832	1.43	2.02
glycerophospholipids	PC ae C36:2	1.44	1.28	1.19	2.44	1.33	1.34	1.65	2.52	2.37	1.47	1.71	1.95	2.36	2.89
glycerophospholipids	PC ae C40:3	0.199	0.188	0.162	0.304	0.156	0.186	0.206	0.351	0.343	0.188	0.229	0.232	0.323	0.424
glycerophospholipids	PC aa C36:6	0.066	0.099	0.068	0.087	0.069	0.095	0.051	0.101	0.102	0.074	0.094	0.115	0.095	0.115
glycerophospholipids	PC aa C38:3	5.25	6.68	5.43	9.19	2.98	5.48	2.74	9.86	11.4	3.58	7.58	8.49	12.9	12.4
glycerophospholipids	PC aa C40:3	0.773	0.78	0.752	1.41	0.359	0.599	0.298	1.66	1.74	0.46	1.14	1.13	1.97	2.05
glycerophospholipids	PC aa C42:1	0.893	0.356	0.592	0.847	1.04	0.552	1.1	0.241	0.358	0.887	0.387	0.379	0.342	0.331
glycerophospholipids	PC aa C42:5	0.337	0.306	0.275	0.48	0.264	0.281	0.325	0.452	0.538	0.312	0.434	0.39	0.517	0.471
glycerophospholipids	PC ae C34:3	0.162	0.222	0.155	0.247	0.124	0.179	0.112	0.794	0.496	0.149	0.204	0.301	0.411	0.819
glycerophospholipids	PC ae C36:3	0.457	0.534	0.476	0.793	0.329	0.453	0.486	1.59	1.28	0.371	0.62	0.798	1.15	1.77
glycerophospholipids	PC aa C34:1	155	162	134	168	183	156	200	144	126	154	146	156	144	138
glycerophospholipids	PC aa C32:2	0.813	1.39	1.04	1.62	0.256	0.942	0.077	1.6	2.07	0.38	1.35	1.88	2.02	2.48
glycerophospholipids	PC aa C42:4	0.379	0.326	0.327	0.521	0.391	0.381	0.483	0.498	0.497	0.394	0.503	0.414	0.501	0.528
glycerophospholipids	PC aa C42:6	0.24	0.312	0.264	0.379	0.208	0.288	0.238	0.41	0.439	0.217	0.336	0.375	0.423	0.44
glycerophospholipids	PC ae C34:2	1.29	1.34	1.17	2.09	1.23	1.35	1.78	3.03	2.56	1.28	1.48	1.93	2.14	3.28
glycerophospholipids	PC ae C38:3	0.542	0.625	0.505	0.925	0.353	0.515	0.434	1.36	1.25	0.433	0.699	0.879	1.23	1.67
glycosylceramides	HexCer(d18:2/22:0)	0.602	0.624	0.647	0.879	0.826	0.772	0.876	0.528	0.435	0.743	0.59	0.641	0.541	0.513
glycosylceramides	Hex2Cer(d18:1/22:0)	0.024	0.046	0.018	0.012	0.01	0.02	0.008	0.043	0.048	0.022	0.021	0.033	0.061	0.06
glycosylceramides	Hex2Cer(d18:1/24:1)	0.054	0.121	0.065	0.072	0.02	0.075	0.016	0.193	0.288	0.027	0.092	0.152	0.277	0.28
glycosylceramides	HexCer(d18:1/18:0)	1.21	1.4	1.43	1.2	1.09	1.51	1.33	1.05	0.866	1.23	1.04	1.31	0.923	0.707
glycosylceramides	Hex2Cer(d18:1/16:0)	0.064	0.157	0.09	0.12	0.043	0.09	0.029	0.24	0.264	0.073	0.12	0.174	0.318	0.267
glycosylceramides	HexCer(d18:2/18:0)	0.032	0.034	0.034	0.035	0.043	0.043	0.054	0.018	0.015	0.044	0.03	0.029	0.027	0.022
glycosylceramides	Hex3Cer(d18:1/16:0)	0.082	0.179	0.095	0.099	0.047	0.103	0.008	0.35	0.52	0.033	0.139	0.239	0.376	0.32
glycosylceramides	Hex3Cer(d18:1/24:1)	0.137	0.315	0.194	0.186	0.038	0.166	0.007	0.667	1.11	0.035	0.284	0.54	0.833	0.83
glycosylceramides	HexCer(d18:2/24:0)	0.567	0.687	0.644	0.578	0.701	0.752	0.889	0.287	0.328	0.733	0.56	0.61	0.405	0.447
glycosylceramides	Hex2Cer(d18:1/24:0)	0.009	0.021	0.018	0.011	0.007	0.012	0.007	0.048	0.039	0.008	0.017	0.028	0.042	0.059
glycosylceramides	Hex2Cer(d18:1/18:0)	0.348	0.418	0.332	0.298	0.378	0.397	0.32	0.341	0.267	0.279	0.318	0.357	0.272	0.231
glycosylceramides	Hex3Cer(d18:1/18:0)	0.031	0.077	0.047	0.04	0.02	0.034	0.021	0.164	0.19	0.019	0.065	0.103	0.126	0.108
nucleobases related	Xanthine	44.8	41	36.7	60.2	34.6	37.6	29.9	59.2	73.1	60.4	41.1	55.6	75.9	96.3
sphingolipids	SM C24:0	3.86	3.48	3.66	5.41	3.25	2.95	3.37	7.52	6.37	3.1	4.56	4.26	7.31	9
sphingolipids	SM C18:0	38.8	35.3	24.6	24	52.3	39.7	49.3	22	10.9	42.7	48.9	30.8	15.9	11.9
sphingolipids	SM C20:2	0.01	0.024	0.011	0.031	0.013	0.026	0.004	0.039	0.036	0.009	0.027	0.025	0.038	0.04
sphingolipids	SM (OH) C16:1	0.25	0.314	0.224	0.294	0.329	0.339	0.232	0.475	0.429	0.364	0.473	0.473	0.448	0.467
sphingolipids	SM (OH) C22:1	0.287	0.301	0.28	0.262	0.235	0.238	0.174	0.471	0.402	0.214	0.282	0.34	0.454	0.614
sphingolipids	SM C26:0	0.069	0.025	0.038	0.12	0.051	0.019	0.048	0.087	0.066	0.022	0.033	0.047	0.085	0.114
sphingolipids	SM C16:1	0.404	0.586	0.402	0.789	0.29	0.593	0.128	0.715	0.95	0.407	0.65	0.76	0.882	0.903
sphingolipids	SM C24:1	9.23	8.27	7.69	13.5	8.63	7.57	7.17	15.7	14.2	8.33	10.1	10.5	15.2	19.2
triacylglycerols	TG(16:0_38:2)	0.09	0.165	0.096	0.117	0.037	0.057	0.045	0.33	0.28	0.049	0.177	0.229	0.333	0.406
triacylglycerols	TG(18:1_36:1)	0.332	0.514	0.387	0.425	0.223	0.411	0.111	0.811	0.829	0.306	0.583	0.539	1.04	1.06
triacylglycerols	TG(18:1_36:2)	0.788	1.15	0.638	0.809	0.236	0.798	0.317	1.84	1.78	0.438	1.18	1.22	2.59	2.32
triacylglycerols	TG(18:1_34:1)	1.03	1.71	0.862	0.963	0.371	1.1	0.28	2.14	2.66	0.509	1.6	1.83	3.03	3.06
triacylglycerols	TG(18:1_36:3)	0.329	0.857	0.417	0.46	0.106	0.646	0.134	1.1	1.38	0.176	0.747	0.978	1.53	1.54
triacylglycerols	TG(18:2_34:1)	0.34	0.841	0.327	0.342	0.069	0.501	0.087	0.846	1.01	0.125	0.611	0.849	1.06	1.23
triacylglycerols	TG(20:2_34:1)	0.092	0.222	0.13	0.149	0.022	0.157	0.0001	0.443	0.417	0.025	0.19	0.33	0.457	0.586
triacylglycerols	TG(18:2_36:1)	0.078	0.252	0.101	0.152	0.073	0.122	0.047	0.384	0.387	0.061	0.214	0.333	0.462	0.502
triacylglycerols	TG(20:1_34:2)	0.066	0.132	0.088	0.06	0.024	0.0001	0.0001	0.185	0.213	0.0001	0.094	0.195	0.25	0.307
triacylglycerols	TG(20:2_32:0)	0.054	0.097	0.06	0.067	0.033	0.065	0.049	0.123	0.2	0.054	0.065	0.133	0.137	0.203
triacylglycerols	TG(16:0_36:2)	0.508	0.94	0.34	0.396	0.14	0.508	0.161	1.22	1.1	0.175	0.736	0.918	1.34	1.54
triacylglycerols	TG(18:2_36:2)	0.199	0.546	0.199	0.315	0.07	0.397	0.09	0.815	0.771	0.088	0.454	0.598	1.03	0.987
triacylglycerols	TG(20:1_34:1)	0.161	0.184	0.187	0.154	0.024	0.161	0.021	0.412	0.445	0.053	0.176	0.313	0.466	0.468
triacylglycerols	TG(18:1_36:4)	0.252	0.486	0.238	0.339	0.153	0.34	0.229	0.547	0.531	0.222	0.354	0.418	0.575	0.662
triacylglycerols	TG(20:4_36:2)	0.087	0.151	0.072	0.099	0.04	0.121	0.05	0.332	0.337	0.045	0.102	0.195	0.23	0.407
triacylglycerols	TG(18:0_34:2)	0.075	0.209	0.077	0.075	0.021	0.113	0.0001	0.252	0.198	0.036	0.178	0.159	0.255	0.272
triacylglycerols	TG(18:1_32:1)	0.239	0.59	0.135	0.251	0.152	0.221	0.178	0.576	0.596	0.217	0.368	0.39	0.576	0.592
triacylglycerols	TG(20:2_34:2)	0.035	0.106	0.064	0.085	0.0001	0.088	0.0001	0.18	0.19	0.01	0.072	0.227	0.196	0.255
glycerophospholipids	PC aa C36:1	69.6	45.7	48.5	77.2	95.5	58.5	110	45.1	37.8	85.3	66.1	46.3	41.8	41.2
glycerophospholipids	PC aa C36:2	29.7	34.6	30	46	26.3	33	31.9	45.8	47.4	29.6	40.9	40.7	50.1	54.1
glycerophospholipids	PC aa C38:6	22.6	21.5	19.4	23.9	36.1	26.3	35	11.5	8.45	30.9	23.8	20.6	9.36	9.14
glycerophospholipids	PC aa C40:1	1.43	0.575	0.853	1.56	1.61	0.933	1.76	0.53	0.741	1.51	0.756	0.642	0.686	0.715
glycerophospholipids	PC ae C44:5	0.559	0.3	0.357	0.583	0.864	0.354	0.9	0.195	0.129	0.595	0.459	0.316	0.167	0.2
sphingolipids	SM C16:0	6.78	10.2	7.44	11.3	5.31	8.6	3.07	16.5	17.6	6.38	11.2	13.3	17.2	19
triacylglycerols	TG(16:0_38:4)	0.058	0.2	0.072	0.083	0.03	0.119	0.0001	0.232	0.208	0.037	0.082	0.177	0.243	0.273
triacylglycerols	TG(18:1_34:2)	0.384	1.22	0.34	0.515	0.133	0.675	0.304	1.15	1.34	0.191	0.733	0.967	1.33	1.76
triacylglycerols	TG(18:2_36:3)	0.195	0.567	0.163	0.276	0.088	0.252	0.102	0.498	0.532	0.125	0.334	0.522	0.702	0.718
triacylglycerols	TG(16:0_36:3)	0.269	0.812	0.257	0.3	0.111	0.424	0.074	0.745	0.73	0.132	0.449	0.64	0.918	0.934
glycerophospholipids	PC aa C38:0	0.959	0.769	0.751	1.3	1.02	0.844	1.08	1.47	1.14	1.14	0.962	0.966	1.14	1.36
triacylglycerols	TG(18:2_38:4)	0.031	0.132	0.063	0.0001	0.017	0.076	0.0001	0.191	0.21	0.0001	0.061	0.163	0.246	0.197
aminoacids	Pro	117	266	117	210	115	179	43.9	218	284	149	163	197	278	426
aminoacids related	SDMA	0.097	0.24	0.088	0.097	0.042	0.145	0.003	0.247	0.182	0.134	0.094	0.184	0.186	0.311
triacylglycerols	TG(16:0_38:3)	0.08	0.208	0.12	0.134	0.0001	0.178	0.0001	0.332	0.309	0.024	0.117	0.255	0.427	0.44
aminoacids related	5-AVA	0.095	0.221	0.112	0.252	0.137	0.158	0.053	0.164	0.252	0.186	0.156	0.339	0.187	0.516
acylcarnitines	C2	9.4	14.5	10.8	14.4	9	11.6	2.24	15.1	13.4	12.7	12.3	10.2	16.9	18.5
aminoacids related	Anserine	0.082	0.131	0.113	0.105	0.183	0.102	0.191	0.057	0.078	0.14	0.121	0.083	0.059	0.048
aminoacids related	Cystine	0.566	0.276	0.297	0.223	0.206	0.208	0.74	0.241	0.154	0.5	0.21	0.048	0.059	0.131
aminoacids related	t4-OH-Pro	15.2	16.1	15.6	23.4	8.79	18.7	3.83	33.8	24.6	15.9	7.63	21.5	36.6	31.1
diacylglycerols	DG(18:1_18:2)	0.483	0.633	0.506	0.63	0.329	0.465	0.307	0.739	0.909	0.237	0.779	0.486	1.15	1.56
glycerophospholipids	PC aa C34:4	0.099	0.182	0.107	0.164	0.077	0.133	0.06	0.154	0.199	0.078	0.139	0.185	0.176	0.203
acylcarnitines	C5-OH (C3-DC-M)	0.107	0.06	0.072	0.081	0.127	0.074	0.089	0.053	0.05	0.119	0.074	0.052	0.072	0.044
glycerophospholipids	PC aa C32:0	121	133	103	97.1	169	140	168	78.2	56.8	140	126	121	69.6	58.8
nucleobases related	Hypoxanthine	207	144	144	178	116	149	137	175	208	199	141	163	227	214
triacylglycerols	TG(20:3_34:1)	0.047	0.15	0.036	0.071	0.036	0.088	0.029	0.212	0.243	0.026	0.063	0.158	0.194	0.325
ceramides	Cer(d18:1/25:0)	2.29	0.802	1.27	2.13	2.62	1.21	1.45	0.657	0.854	2.21	1.27	0.682	0.962	1.11
glycerophospholipids	PC ae C38:2	1.02	0.758	0.839	1.72	0.89	0.765	1.06	1.56	1.48	0.926	0.999	1.06	1.5	1.84
triacylglycerols	TG(20:4_34:1)	0.17	0.363	0.118	0.109	0.114	0.207	0.096	0.465	0.393	0.096	0.172	0.244	0.342	0.512
aminoacids	Ile	17.6	29.3	17.6	19.7	24.4	24.3	9.93	16.2	30.2	26.4	30.9	28.9	38.2	22.3
ceramides	Cer(d18:1/24:1)	4.64	2.36	3.03	5.66	5.22	3.1	4.13	2.95	2.95	4.55	2.86	2.28	2.87	3.66
glycosylceramides	HexCer(d18:1/24:1)	45	41.2	47	42.2	42.6	41.1	41.1	32.5	43.2	40.7	34.4	35.5	36.4	45.9
aminoacids related	1-Met-His	1.45	4.57	1.81	3.92	1.87	3.88	1.03	5.23	4.51	2.69	2.19	4.32	9.02	3.42
aminoacids related	Carnosine	3.05	2.26	2.93	3.33	4.61	2.32	6.44	1.35	1.5	4.86	3.61	1.81	1.49	0.939
aminoacids related	Cit	19.1	28.9	19.2	39.9	18.3	24.9	5.31	48.6	44.7	19.6	15.1	31.9	36.3	59.7
aminoacids related	HCys	3.74	4.2	5.29	6.34	2.84	5.67	0.753	6.66	6.43	2	3.73	8.03	9.47	12.3
glycerophospholipids	PC aa C36:3	9.27	16.2	11.2	17.4	7.01	12.8	6.15	15.7	18.3	6.49	15.1	16.7	21.6	20.5
glycerophospholipids	PC aa C36:4	31.8	32.5	25.3	30.4	42.7	39.7	50.2	21.1	16.2	40.8	34.1	31	15.9	13.6
glycerophospholipids	PC aa C40:6	13.2	10.9	10.2	13.8	19.2	13.1	21.5	7.25	5.65	16.2	15	10.5	6.63	6.48
glycosylceramides	HexCer(d18:2/23:0)	0.215	0.186	0.176	0.13	0.222	0.204	0.257	0.123	0.12	0.219	0.196	0.159	0.074	0.178
sphingolipids	SM (OH) C24:1	0.054	0.06	0.062	0.072	0.06	0.072	0.049	0.106	0.095	0.066	0.058	0.05	0.091	0.144
triacylglycerols	TG(18:2_34:0)	0.065	0.258	0.094	0.073	0.019	0.088	0.054	0.224	0.218	0.0001	0.153	0.248	0.284	0.352
triacylglycerols	TG(18:2_36:4)	0.137	0.308	0.059	0.096	0.043	0.14	0.055	0.203	0.183	0.058	0.202	0.159	0.231	0.287
triacylglycerols	TG(18:1_35:3)	0.07	0.027	0.032	0.084	0.079	0.082	0.072	0.026	0.031	0.058	0.058	0.07	0.074	0.0001
triacylglycerols	TG(20:4_36:3)	0.051	0.151	0.045	0.0001	0.019	0.038	0.03	0.2	0.158	0.039	0.0001	0.116	0.148	0.245
triacylglycerols	TG(20:2_32:1)	0.031	0.057	0.0001	0.05	0.052	0.035	0.022	0.093	0.089	0.0001	0.028	0.088	0.105	0.148
glycosylceramides	Hex3Cer(d18:1_20:0)	0.02	0.026	0.016	0.018	0.013	0.0001	0.0001	0.048	0.065	0.007	0.0001	0.022	0.129	0.065
acylcarnitines	C4	0.617	1.14	0.705	1.14	0.673	0.7	0.08	0.871	0.857	1.19	0.587	0.868	1.7	1.67
aminoacids	Thr	142	165	135	165	146	182	68.6	157	228	190	162	160	192	161
ceramides	Cer(d18:1/26:1)	0.064	0.049	0.071	0.069	0.065	0.049	0.039	0.108	0.086	0.051	0.062	0.056	0.082	0.125
triacylglycerols	TG(18:2_34:2)	0.227	0.749	0.117	0.227	0.042	0.314	0.085	0.438	0.518	0.087	0.303	0.475	0.611	0.664
triacylglycerols	TG(17:0_34:1)	0.215	0.215	0.166	0.23	0.245	0.261	0.312	0.163	0.147	0.264	0.233	0.151	0.17	0.169
triacylglycerols	TG(18:1_34:4)	0.041	0.074	0.035	0.039	0.058	0.058	0.042	0.0001	0.054	0.053	0.034	0.03	0.055	0.032
acylcarnitines	C14	0.234	0.361	0.196	0.443	0.412	0.46	0.135	0.175	0.124	0.38	0.24	0.123	0.246	0.165
aminoacids	Asp	248	137	187	300	316	165	480	138	104	378	224	186	133	103
aminoacids related	BABA	0.07	0.385	0.064	0.178	0.306	0.516	0.155	0.315	0.244	0.321	0.712	0.545	0.422	0.158
biogenic amines	GABA	92.2	75.1	52.7	66.7	161	78.8	258	41.5	25.2	135	142	68.9	41.2	17
ceramides	Cer(d18:1/18:0)	2.87	3.07	2.46	2.5	2.96	3.13	2.72	2.33	1.34	3.01	3.28	2.35	1.44	1.39
ceramides	Cer(d18:1/18:1)	0.145	0.08	0.132	0.141	0.163	0.111	0.109	0.091	0.085	0.14	0.12	0.092	0.103	0.093
ceramides	Cer(d18:1/23:0)	0.311	0.17	0.237	0.373	0.372	0.217	0.293	0.206	0.2	0.332	0.201	0.152	0.203	0.244
ceramides	Cer(d18:2/18:0)	1.49	1.2	1	1.04	2.03	2.1	2.92	0.748	0.324	2.22	1.85	1.11	0.371	0.289
glycerophospholipids	PC aa C34:2	25.1	38.3	27.4	39.5	19.6	36.8	16.3	35.3	41	19.2	35.7	42.1	42.2	47.7
glycerophospholipids	PC aa C38:4	32	30	23.7	30.9	40.1	36.3	56.2	26.6	19.1	39.7	37.5	29.1	20.2	16.3
glycerophospholipids	PC ae C42:3	0.903	0.677	0.623	0.777	1.23	0.752	1.36	0.545	0.361	1.09	0.934	0.716	0.419	0.378
sphingolipids	SM (OH) C22:2	0.238	0.179	0.16	0.321	0.285	0.222	0.222	0.351	0.305	0.261	0.279	0.247	0.412	0.442
triacylglycerols	TG(16:0_36:4)	0.22	0.409	0.063	0.113	0.044	0.158	0.0001	0.236	0.265	0.091	0.164	0.21	0.276	0.341
glycerophospholipids	PC aa C32:3	0.047	0.093	0.042	0.08	0.041	0.062	0.03	0.073	0.092	0.042	0.067	0.08	0.092	0.093
ceramides	Cer(d18:2/24:0)	0.07	0.074	0.082	0.107	0.084	0.102	0.065	0.104	0.095	0.095	0.082	0.087	0.093	0.152
glycerophospholipids	PC aa C40:5	2	2.02	1.73	2.54	1.93	1.97	2.57	2.39	2.72	1.91	2.57	2.22	2.7	2.33
glycerophospholipids	PC ae C42:2	0.361	0.238	0.22	0.43	0.399	0.27	0.448	0.201	0.232	0.374	0.274	0.225	0.238	0.246
triacylglycerols	TG(20:1_34:3)	0.02	0.026	0.0001	0.019	0.0001	0.0001	0.0001	0.029	0.043	0.0001	0.0001	0.016	0.032	0.033
glycosylceramides	Hex3Cer(d18:1_22:0)	0.032	0.057	0.038	0.034	0.009	0.022	0.0001	0.172	0.211	0.0001	0.0001	0.07	0.155	0.164
triacylglycerols	TG(16:1_36:3)	0.055	0.159	0.0001	0.049	0.031	0.113	0.0001	0.102	0.134	0.0001	0.063	0.091	0.163	0.181
carboxylic acids	AconAcid	0.178	0.197	0.154	0.137	0.161	0.17	0.145	0.113	0.148	0.161	0.17	0.152	0.108	0.139
sphingolipids	SM C26:1	0.084	0.058	0.082	0.055	0.071	0.05	0.077	0.258	0.224	0.081	0.11	0.074	0.172	0.26
aminoacids	Trp	8.97	20.1	9.08	14.9	10.5	8.97	6.08	11.3	18.3	12.6	7.82	12.2	24.9	23
ceramides	Cer(d18:2/24:1)	0.21	0.195	0.196	0.339	0.302	0.263	0.227	0.282	0.297	0.29	0.295	0.242	0.27	0.353
glycerophospholipids	PC aa C36:5	0.441	0.631	0.406	0.558	0.454	0.594	0.586	0.392	0.463	0.492	0.511	0.506	0.398	0.409
glycerophospholipids	PC aa C38:5	7.67	7.34	6.29	7.84	8.96	8.94	14.4	6.24	5.17	10.2	9.18	7.28	5.3	4.28
triacylglycerols	TG(20:3_36:3)	0.046	0.094	0.025	0.052	0.028	0.084	0.011	0.123	0.093	0.0001	0.045	0.087	0.102	0.157
triacylglycerols	TG(22:5_34:1)	0.027	0.075	0.028	0.0001	0.042	0.102	0.021	0.061	0.065	0.031	0.055	0.087	0.094	0.062
triacylglycerols	TG(20:4_32:0)	0.06	0.217	0.057	0.065	0.12	0.096	0.054	0.116	0.124	0.082	0.078	0.135	0.15	0.106
acylcarnitines	C14:1	0.028	0.036	0.019	0.047	0.041	0.036	0.011	0.023	0.017	0.038	0.021	0.011	0.027	0.017
triacylglycerols	TG(18:1_34:3)	0.101	0.291	0.102	0.138	0.092	0.196	0.098	0.179	0.254	0.098	0.155	0.232	0.201	0.242
triacylglycerols	TG(20:3_34:2)	0.058	0.095	0.032	0.06	0.0001	0.046	0.0001	0.154	0.155	0.0001	0.0001	0.079	0.09	0.169
triacylglycerols	TG(22:6_34:1)	0.224	0.571	0.231	0.25	0.25	0.513	0.194	0.452	0.424	0.259	0.373	0.303	0.447	0.299
aminoacids	Ala	245	297	209	405	239	287	184	299	421	284	206	296	355	312
aminoacids	Leu	29.1	38.5	26.4	35.2	35.5	47.2	32.8	36.5	37.3	34.3	33.8	45.8	59.4	42.3
biogenic amines	Spermine	2.02	1.74	1.75	0.605	1.12	1.53	0.697	0.707	1.27	0.5	1.23	0.91	1.1	0.905
ceramides	Cer(d18:1/20:0)	0.117	0.106	0.093	0.121	0.111	0.111	0.069	0.158	0.127	0.107	0.126	0.11	0.126	0.139
glycerophospholipids	PC ae C40:1	1.04	1.13	0.92	1.32	1.09	1.21	1.18	0.912	0.98	0.985	1.17	1.2	0.981	1.07
triacylglycerols	TG(16:0_38:5)	0.052	0.25	0.057	0.065	0.045	0.074	0.0001	0.115	0.222	0.05	0.056	0.11	0.133	0.148
triacylglycerols	TG(20:4_34:0)	0.07	0.141	0.045	0.034	0.047	0.097	0.044	0.144	0.129	0.0001	0.085	0.101	0.095	0.136
ceramides	Cer(d18:2/23:0)	0.021	0.022	0.023	0.023	0.037	0.032	0.029	0.019	0.018	0.038	0.025	0.023	0.017	0.021
ceramides	Cer(d18:1/22:0)	0.268	0.239	0.287	0.279	0.231	0.269	0.178	0.356	0.339	0.239	0.212	0.242	0.34	0.419
triacylglycerols	TG(22:4_34:2)	0.019	0.1	0.044	0.043	0.015	0.107	0.0001	0.094	0.17	0.0001	0.05	0.065	0.088	0.154
triacylglycerols	TG(20:4_34:2)	0.05	0.222	0.035	0.037	0.039	0.077	0.026	0.224	0.207	0.032	0.032	0.122	0.135	0.261
acylcarnitines	C18	0.204	0.28	0.139	0.264	0.223	0.232	0.102	0.328	0.231	0.259	0.178	0.186	0.432	0.334
glycerophospholipids	PC aa C34:3	0.776	1.56	0.939	1.55	0.413	1.13	0.334	1.14	1.52	0.386	1.11	1.43	1.66	1.67
indoles derivatives	Ind-SO4	0.053	0.124	0.101	0.126	0.11	0.045	0.07	0.04	0.14	0.025	0.072	0.114	0.034	0.02
triacylglycerols	TG(22:5_34:3)	0.137	0.155	0.148	0.113	0.205	0.143	0.123	0.09	0.071	0.206	0.115	0.169	0.08	0.118
glycerophospholipids	PC ae C44:3	0.183	0.146	0.119	0.167	0.208	0.145	0.25	0.13	0.129	0.185	0.197	0.14	0.145	0.13
triacylglycerols	TG(18:0_36:4)	0.074	0.118	0.089	0.091	0.095	0.122	0.108	0.132	0.102	0.071	0.106	0.125	0.108	0.163
acylcarnitines	C18:1	0.212	0.295	0.175	0.291	0.248	0.277	0.135	0.291	0.212	0.31	0.227	0.154	0.414	0.353
aminoacids	Gly	249	431	291	448	300	411	237	375	377	418	327	377	490	429
ceramides	Cer(d18:1/24:0)	0.452	0.364	0.481	0.379	0.389	0.364	0.252	0.541	0.504	0.316	0.322	0.387	0.458	0.685
aminoacids	Phe	25.7	45.2	29.7	39.3	44.2	41.5	20.5	34.6	40.4	44.5	51.3	33.7	56	38.6
aminoacids related	ProBetaine	1.04	1.24	0.958	1.26	0.855	1.05	0.372	1.16	1.1	1.17	1	0.818	1.27	1.3
glycerophospholipids	PC aa C32:1	15.2	19.1	15.7	22.3	17	17.8	16.6	17.1	20.2	13.9	17.9	20.7	21.1	21.5
aminoacids	Glu	699	890	847	∞	906	1182	758	∞	1064	679	628	∞	∞	1308
glycerophospholipids	PC ae C38:0	0.268	0.366	0.25	0.32	0.342	0.33	0.298	0.251	0.257	0.315	0.333	0.325	0.267	0.268
glycosylceramides	Hex2Cer(d18:1/14:0)	0.045	0.05	0.052	0.048	0.054	0.056	0.044	0.05	0.067	0.05	0.039	0.051	0.058	0.064
biogenic amines	Putrescine	16.1	16.1	18.5	16.9	17.4	26.4	5.87	15	12.7	15.1	22	18.6	15	13.7
glycosylceramides	HexCer(d18:1/26:0)	0.027	0.026	0.041	0.035	0.037	0.036	0.033	0.018	0.048	0.036	0.03	0.022	0.035	0.025
glycosylceramides	HexCer(d18:1/18:1)	0.793	0.653	0.915	0.682	0.733	0.764	0.626	0.672	0.634	0.721	0.728	0.67	0.728	0.725
ceramides	Cer(d18:2/20:0)	0.086	0.072	0.056	0.08	0.133	0.119	0.12	0.059	0.051	0.142	0.141	0.077	0.049	0.055
fatty acids	FA(18:2)	16.6	33.1	13.6	20.4	11	15.2	12	17	29.2	9.39	15.6	16.7	26.5	28
glycosylceramides	HexCer(d18:1/22:0)	6.83	7.87	8.55	6.73	5.26	7.86	4.74	8.11	8.77	5.35	6.17	7.13	7.75	9.18
triacylglycerols	TG(18:1_38:5)	0.109	0.183	0.133	0.136	0.093	0.19	0.099	0.163	0.228	0.078	0.128	0.112	0.223	0.264
triacylglycerols	TG(22:6_34:2)	0.049	0.501	0.061	0.07	0.062	0.26	0.017	0.191	0.206	0.052	0.082	0.104	0.211	0.198
alkaloids	Trigonelline	0.193	0.088	0.0001	0.007	0.021	0.115	0.03	0.002	0.073	0.127	0.0001	0.096	0.0001	0.0001
acylcarnitines	C16-OH	0.061	0.09	0.036	0.074	0.074	0.079	0.02	0.038	0.043	0.068	0.078	0.036	0.055	0.048
aminoacids	Lys	79	117	101	228	102	139	38.2	106	138	103	90	139	151	117
acylcarnitines	C16	0.56	1.15	0.427	0.913	0.863	0.943	0.297	0.529	0.41	0.881	0.631	0.397	0.868	0.637
biogenic amines	beta-Ala	7.84	10.3	5.23	10.2	12.5	8.4	13.1	6.76	6.97	11.7	24.6	6.63	8.32	6.84
diacylglycerols	DG(18:1_18:1)	0.568	0.344	0.381	0.551	0.525	0.419	0.831	0.67	0.697	0.407	0.534	0.32	0.649	0.843
fatty acids	FA(18:1)	23.1	26.2	13.1	18.6	19.8	18.4	22.1	20.6	26.1	11	21	20.7	31.7	23.8
ceramides	Cer(d18:1/26:0)	0.066	0.034	0.037	0.049	0.059	0.033	0.03	0.045	0.045	0.043	0.046	0.038	0.046	0.065
ceramides	Cer(d18:2/22:0)	0.067	0.06	0.063	0.099	0.085	0.092	0.062	0.069	0.073	0.102	0.08	0.069	0.066	0.079
sugars	H1	511	485	385	521	568	528	511	484	400	469	471	487	557	644
triacylglycerols	TG(18:1_38:6)	0.147	0.306	0.17	0.119	0.18	0.255	0.147	0.158	0.108	0.173	0.169	0.149	0.195	0.139
acylcarnitines	C16:1	0.058	0.11	0.054	0.101	0.096	0.113	0.034	0.072	0.062	0.086	0.075	0.036	0.084	0.088
acylcarnitines	C3-DC (C4-OH)	0.439	1.48	0.516	0.846	0.533	0.827	0.109	0.562	1.83	0.39	0.821	0.683	0.912	0.634
aminoacids	Ser	92.7	95.8	83.8	92.6	114	100	116	78.7	75.6	118	96.3	119	84.2	73.6
aminoacids	Val	61.5	116	64.1	51.4	85.3	55.9	18.7	47.5	79.4	110	81	58.7	85.1	72.6
aminoacids related	AABA	1.27	2.04	1.16	1.9	1.19	2.51	0.549	1.36	5.48	1.14	1.13	2.21	3.65	1.44
aminoacids related	alpha-AAA	9.01	7.26	6.39	6.64	14	4.15	7.4	5.98	8.51	11.8	6.73	10.9	7.08	10.7
dihydroceramides	Cer(d18:0/24:1)	0.754	0.327	0.435	0.875	0.888	0.491	0.73	0.729	0.606	0.697	0.401	0.356	0.593	0.783
glycerophospholipids	PC aa C42:2	0.939	0.376	0.587	1.07	0.95	0.548	1.08	0.628	0.691	0.903	0.68	0.516	0.663	0.792
vitamins & cofactors	Choline	99.5	49.9	83.3	94.5	64.7	79.6	77.2	54.7	75.8	83.1	96.9	90.6	92.8	104
acylcarnitines	C18:1-OH	0.06	0.078	0.042	0.071	0.067	0.07	0.025	0.042	0.045	0.067	0.081	0.033	0.063	0.042
glycosylceramides	HexCer(d18:1/26:1)	0.131	0.111	0.134	0.079	0.108	0.138	0.09	0.092	0.117	0.097	0.086	0.119	0.108	0.124
triacylglycerols	TG(16:0_38:6)	0.067	0.282	0.076	0.07	0.088	0.188	0.047	0.111	0.097	0.047	0.091	0.124	0.164	0.085
aminoacids related	Creatinine	14.4	14.7	12.7	15.9	15.5	15.5	18.7	15.4	16	15.6	14.9	15.6	15.6	14.5
biogenic amines	Serotonin	0.119	0.109	0.12	0.119	0.217	0.123	0.214	0.068	0.119	0.125	0.23	0.064	0.216	0.09
sphingolipids	SM C18:1	3.44	3.72	2.24	2.48	6.23	4.22	5.41	2.1	1.47	4.48	4.01	3.16	1.7	1.58
acylcarnitines	C5	0.213	0.174	0.262	0.239	0.331	0.194	0.072	0.182	0.174	0.643	0.147	0.153	0.236	0.217
triacylglycerols	TG(18:1_35:2)	0.126	0.045	0.05	0.09	0.072	0.069	0.104	0.08	0.08	0.072	0.072	0.076	0.101	0.082
aminoacids related	HArg	0.466	0.438	0.335	0.56	0.534	0.363	0.236	0.586	0.428	0.341	0.384	0.612	0.419	0.426
cholesterol esters	CE(15:0)	1.15	0.792	1.19	1.04	0.956	0.949	0.842	1.13	1.25	0.927	0.748	0.886	1.06	1.4
glycerophospholipids	PC aa C40:4	3.25	2.67	2.41	3.61	3.92	2.84	4.55	3.44	3.15	3.66	4.19	3.03	3.54	3.17
triacylglycerols	TG(20:4_36:4)	0.113	0.133	0.075	0.051	0.106	0.073	0.043	0.126	0.119	0.063	0.052	0.095	0.06	0.121
acylcarnitines	C18:2	0.045	0.102	0.043	0.062	0.056	0.104	0.022	0.072	0.058	0.045	0.053	0.031	0.082	0.116
acylcarnitines	C3	0.388	0.459	0.403	0.495	0.457	0.385	0.129	0.446	0.458	0.495	0.326	0.29	0.439	0.482
glycosylceramides	HexCer(d18:1/23:0)	2.16	1.97	2.77	1.68	1.67	2.11	1.58	2.11	2.28	1.51	1.83	1.91	2.08	2.8
aminoacids related	Taurine	526	563	461	573	651	584	680	628	545	563	590	584	527	508
aminoacids	Arg	45	56.4	44.4	63.1	49.6	46.4	40.1	28.7	55.5	54.2	43.7	53.6	52	60.1
carboxylic acids	Lac	1819	2057	1458	1921	2023	2004	1430	1627	1877	1823	1763	2220	1541	1914
glycerophospholipids	PC ae C42:1	0.654	0.549	0.53	0.767	0.689	0.633	0.755	0.551	0.631	0.712	0.696	0.649	0.651	0.617
glycosylceramides	HexCer(d18:1/24:0)	1.93	2.1	2.46	1.32	1.37	1.91	0.951	2.03	1.95	0.949	1.25	2.09	1.39	1.69
triacylglycerols	TG(22:6_32:0)	0.139	0.51	0.207	0.14	0.237	0.397	0.118	0.174	0.18	0.219	0.247	0.281	0.226	0.146
glycerophospholipids	PC ae C34:1	7.7	6.48	5.82	9.68	8.6	6.97	10.7	7.62	7.7	8.69	7.95	8.28	7.66	7.87
diacylglycerols	DG(16:0_18:1)	3.4	2.22	2.76	3.24	3.2	2.45	4.14	2.96	3.3	2.63	2.58	2.21	3.3	3.83
aminoacids	Gln	617	481	513	869	859	667	778	578	530	1084	936	737	507	280
glycosylceramides	HexCer(d18:1/20:0)	0.519	0.595	0.713	0.699	0.488	0.608	0.415	0.732	0.58	0.478	0.457	0.528	0.515	0.7
acylcarnitines	C0	39.7	37.1	34	48.3	45.6	37.1	24.7	38.8	34.6	49	44.6	28.3	33	38.2
aminoacids	Cys	49.7	35.4	47.4	57.6	49.1	52.9	103	51.6	40.2	53.7	46	68.7	48.2	59
glycerophospholipids	PC aa C40:2	2.08	0.979	1.31	2.83	2	1.22	2.27	1.92	1.95	2.13	1.69	1.29	2.06	2.08
glycerophospholipids	PC ae C36:1	9.41	7	7.1	13	10.8	7.95	13.4	8.34	8.18	11.2	9.94	9.39	9.28	9.86
glycerophospholipids	PC ae C42:0	0.638	0.516	0.496	0.753	0.681	0.517	0.864	0.593	0.61	0.633	0.725	0.562	0.672	0.654
triacylglycerols	TG(20:3_36:4)	0.07	0.089	0.07	0.081	0.103	0.132	0.104	0.083	0.074	0.085	0.081	0.077	0.108	0.105

## Sheet: 2C
				Area	X	Y	Seq
		Up	Down	Total	DA	Sequ
	Amino acids	0	4	4	1	6	Amino acids
	Amino Acids related	0	6	6	1	5	Amino Acids related
	Phosphatidylcholine	2	25	27	0.851852	4	Phosphatidylcholine
	Sphingolipids	6	14	20	0.4	2	Sphingolipids
	Triacylglycerols	0	18	18	1	1	Triacylglycerols
				50	0.2	6	None
															Amino Acids related
															Glycerophospholipids
															Glycosylceramides
															Sphingolipids
															Triacylglycerols

## Sheet: 2D
		1	2	3	4	5	6	7	8	9	10	11	12	13	14
		Regular diet	Regular diet	Regular diet	Regular diet	Regular diet	Regular diet	Regular diet	Ketogenic diet	Ketogenic diet	Ketogenic diet	Ketogenic diet	Ketogenic diet	Ketogenic diet	Ketogenic diet
aminoacids	Met	12.5	13.3	10.8	23.5	16.6	15.8	13.2	16.1	25.4	26.6	17.2	28.8	30.6	23.4
aminoacids	His	31.4	39.3	29.9	48.8	32	33.9	19.1	49.7	48.8	50.7	44.5	34.8	73.2	53.4
aminoacids	Tyr	13.4	30.5	18.4	29.8	17.8	18.1	11.3	20.4	31	28.2	22.8	36.2	34.4	31.3
aminoacids	Asn	22.5	25.9	26.9	48.1	21.5	28.5	16.1	44.8	47.6	32.3	28.4	38.7	55.6	36.7
aminoacids related	Betaine	0.0001	7.53	2.5	3.49	3.62	2.91	0.0001	8.07	14.1	4.6	5.46	15.3	10.2	20.7
aminoacids related	Met-SO	0.212	0.229	0.224	0.317	0.221	0.216	0.181	0.227	0.371	0.336	0.228	0.325	0.357	0.319
aminoacids related	Orn	3.61	2.75	3.62	4.7	2.75	3.66	1.6	5.16	6.15	8.69	4.2	4.35	4.4	7.16
aminoacids related	ADMA	0.268	0.514	0.413	0.789	0.259	0.515	0.18	0.827	1.19	0.581	0.636	0.371	0.981	1.09
aminoacids related	Sarcosine	0.548	0.698	0.684	0.518	0.465	0.843	0.081	1.25	0.758	0.848	0.519	0.833	1.29	1.65
aminoacids related	3-Met-His	0.455	0.842	0.66	0.82	0.455	0.675	0.186	0.979	1.1	0.619	0.633	0.87	1.01	0.919
biogenic amines	Spermidine	9.06	9.27	10.9	8.61	6.18	7.15	5.67	3.31	2.78	6.08	9.93	5.41	2.4	4.67
ceramides	Cer(d18:1/16:0)	0.144	0.215	0.148	0.209	0.101	0.17	0.064	0.594	0.514	0.151	0.217	0.283	0.402	0.638
ceramides	Cer(d18:2/16:0)	0.052	0.072	0.057	0.075	0.053	0.118	0.028	0.105	0.112	0.077	0.116	0.104	0.09	0.112
ceramides	Cer(d18:1/20:0(OH))	1.72	1.22	1.57	2.04	1.8	1.55	1.44	2.1	1.96	1.56	1.39	1.58	2.38	2.43
diacylglycerols	DG(18:0_20:4)	0.247	0.157	0.16	0.205	0.387	0.186	0.339	0.071	0.109	0.303	0.153	0.112	0.139	0.125
diacylglycerols	DG(17:0_18:1)	0.815	1.02	0.915	0.633	0.802	0.965	0.821	0.779	0.566	0.609	0.97	0.75	0.572	0.56
fatty acids	AA	31.7	29.9	15.8	16	33.2	19.8	41.1	11.6	12.3	24.8	18.6	16.2	9.78	7.7
fatty acids	DHA	8.63	14.1	6.16	10.6	13.1	8.67	11.3	6.33	5.92	9.69	7.89	7.23	7.08	5.58
glycerophospholipids	PC ae C34:0	1.79	1.97	1.68	1.62	2.05	1.84	1.85	2.35	2.12	2.09	2.49	2.62	2.32	2.72
glycerophospholipids	PC ae C38:4	0.929	0.976	0.809	1.12	0.947	0.993	0.954	1.85	1.64	1.21	1.26	1.39	1.44	1.75
glycerophospholipids	PC ae C40:6	0.415	0.464	0.378	0.513	0.499	0.469	0.432	0.842	0.693	0.589	0.586	0.643	0.609	0.844
glycerophospholipids	PC ae C38:6	0.482	0.68	0.444	0.679	0.647	0.625	0.484	1.07	0.915	0.788	0.728	0.788	0.76	0.964
glycerophospholipids	PC ae C32:1	1.56	1.66	1.3	1.89	1.68	1.64	1.9	2.92	2.28	1.85	1.99	1.98	2.02	2.91
glycerophospholipids	PC ae C36:4	1.23	1.37	1.02	1.57	1.38	1.27	0.976	1.98	1.94	1.55	1.51	1.7	1.67	2
glycerophospholipids	PC ae C38:5	0.876	1.07	0.812	1.35	0.817	0.931	0.669	2.29	2.07	1.15	1.33	1.48	1.71	2.17
glycerophospholipids	PC ae C40:4	0.313	0.282	0.274	0.388	0.298	0.304	0.296	0.524	0.466	0.319	0.379	0.386	0.482	0.572
glycerophospholipids	PC ae C40:5	0.321	0.35	0.288	0.481	0.288	0.337	0.328	1.02	0.785	0.4	0.465	0.493	0.675	0.938
glycerophospholipids	PC ae C36:5	0.512	0.609	0.478	0.638	0.622	0.589	0.67	1.2	0.897	0.644	0.687	0.6	0.713	1.03
glycerophospholipids	PC aa C30:0	6.13	7.02	6.25	8.76	3.91	6.47	2.98	9.97	11.4	4.57	7.74	10.3	10.5	14.3
glycerophospholipids	PC aa C36:0	1.26	0.765	0.915	0.943	0.685	0.658	0.927	1.99	1.51	1.1	1.22	0.832	1.43	2.02
glycerophospholipids	PC ae C36:2	1.44	1.28	1.19	2.44	1.33	1.34	1.65	2.52	2.37	1.47	1.71	1.95	2.36	2.89
glycerophospholipids	PC ae C40:3	0.199	0.188	0.162	0.304	0.156	0.186	0.206	0.351	0.343	0.188	0.229	0.232	0.323	0.424
glycerophospholipids	PC aa C36:6	0.066	0.099	0.068	0.087	0.069	0.095	0.051	0.101	0.102	0.074	0.094	0.115	0.095	0.115
glycerophospholipids	PC aa C38:3	5.25	6.68	5.43	9.19	2.98	5.48	2.74	9.86	11.4	3.58	7.58	8.49	12.9	12.4
glycerophospholipids	PC aa C40:3	0.773	0.78	0.752	1.41	0.359	0.599	0.298	1.66	1.74	0.46	1.14	1.13	1.97	2.05
glycerophospholipids	PC aa C42:1	0.893	0.356	0.592	0.847	1.04	0.552	1.1	0.241	0.358	0.887	0.387	0.379	0.342	0.331
glycerophospholipids	PC aa C42:5	0.337	0.306	0.275	0.48	0.264	0.281	0.325	0.452	0.538	0.312	0.434	0.39	0.517	0.471
glycerophospholipids	PC ae C34:3	0.162	0.222	0.155	0.247	0.124	0.179	0.112	0.794	0.496	0.149	0.204	0.301	0.411	0.819
glycerophospholipids	PC ae C36:3	0.457	0.534	0.476	0.793	0.329	0.453	0.486	1.59	1.28	0.371	0.62	0.798	1.15	1.77
glycerophospholipids	PC aa C34:1	155	162	134	168	183	156	200	144	126	154	146	156	144	138
glycerophospholipids	PC aa C32:2	0.813	1.39	1.04	1.62	0.256	0.942	0.077	1.6	2.07	0.38	1.35	1.88	2.02	2.48
glycerophospholipids	PC aa C42:4	0.379	0.326	0.327	0.521	0.391	0.381	0.483	0.498	0.497	0.394	0.503	0.414	0.501	0.528
glycerophospholipids	PC aa C42:6	0.24	0.312	0.264	0.379	0.208	0.288	0.238	0.41	0.439	0.217	0.336	0.375	0.423	0.44
glycerophospholipids	PC ae C34:2	1.29	1.34	1.17	2.09	1.23	1.35	1.78	3.03	2.56	1.28	1.48	1.93	2.14	3.28
glycerophospholipids	PC ae C38:3	0.542	0.625	0.505	0.925	0.353	0.515	0.434	1.36	1.25	0.433	0.699	0.879	1.23	1.67
glycosylceramides	HexCer(d18:2/22:0)	0.602	0.624	0.647	0.879	0.826	0.772	0.876	0.528	0.435	0.743	0.59	0.641	0.541	0.513
glycosylceramides	Hex2Cer(d18:1/22:0)	0.024	0.046	0.018	0.012	0.01	0.02	0.008	0.043	0.048	0.022	0.021	0.033	0.061	0.06
glycosylceramides	Hex2Cer(d18:1/24:1)	0.054	0.121	0.065	0.072	0.02	0.075	0.016	0.193	0.288	0.027	0.092	0.152	0.277	0.28
glycosylceramides	HexCer(d18:1/18:0)	1.21	1.4	1.43	1.2	1.09	1.51	1.33	1.05	0.866	1.23	1.04	1.31	0.923	0.707
glycosylceramides	Hex2Cer(d18:1/16:0)	0.064	0.157	0.09	0.12	0.043	0.09	0.029	0.24	0.264	0.073	0.12	0.174	0.318	0.267
glycosylceramides	HexCer(d18:2/18:0)	0.032	0.034	0.034	0.035	0.043	0.043	0.054	0.018	0.015	0.044	0.03	0.029	0.027	0.022
glycosylceramides	Hex3Cer(d18:1/16:0)	0.082	0.179	0.095	0.099	0.047	0.103	0.008	0.35	0.52	0.033	0.139	0.239	0.376	0.32
glycosylceramides	Hex3Cer(d18:1/24:1)	0.137	0.315	0.194	0.186	0.038	0.166	0.007	0.667	1.11	0.035	0.284	0.54	0.833	0.83
glycosylceramides	HexCer(d18:2/24:0)	0.567	0.687	0.644	0.578	0.701	0.752	0.889	0.287	0.328	0.733	0.56	0.61	0.405	0.447
glycosylceramides	Hex2Cer(d18:1/24:0)	0.009	0.021	0.018	0.011	0.007	0.012	0.007	0.048	0.039	0.008	0.017	0.028	0.042	0.059
glycosylceramides	Hex2Cer(d18:1/18:0)	0.348	0.418	0.332	0.298	0.378	0.397	0.32	0.341	0.267	0.279	0.318	0.357	0.272	0.231
glycosylceramides	Hex3Cer(d18:1/18:0)	0.031	0.077	0.047	0.04	0.02	0.034	0.021	0.164	0.19	0.019	0.065	0.103	0.126	0.108
nucleobases related	Xanthine	44.8	41	36.7	60.2	34.6	37.6	29.9	59.2	73.1	60.4	41.1	55.6	75.9	96.3
sphingolipids	SM C24:0	3.86	3.48	3.66	5.41	3.25	2.95	3.37	7.52	6.37	3.1	4.56	4.26	7.31	9
sphingolipids	SM C18:0	38.8	35.3	24.6	24	52.3	39.7	49.3	22	10.9	42.7	48.9	30.8	15.9	11.9
sphingolipids	SM C20:2	0.01	0.024	0.011	0.031	0.013	0.026	0.004	0.039	0.036	0.009	0.027	0.025	0.038	0.04
sphingolipids	SM (OH) C16:1	0.25	0.314	0.224	0.294	0.329	0.339	0.232	0.475	0.429	0.364	0.473	0.473	0.448	0.467
sphingolipids	SM (OH) C22:1	0.287	0.301	0.28	0.262	0.235	0.238	0.174	0.471	0.402	0.214	0.282	0.34	0.454	0.614
sphingolipids	SM C26:0	0.069	0.025	0.038	0.12	0.051	0.019	0.048	0.087	0.066	0.022	0.033	0.047	0.085	0.114
sphingolipids	SM C16:1	0.404	0.586	0.402	0.789	0.29	0.593	0.128	0.715	0.95	0.407	0.65	0.76	0.882	0.903
sphingolipids	SM C24:1	9.23	8.27	7.69	13.5	8.63	7.57	7.17	15.7	14.2	8.33	10.1	10.5	15.2	19.2
triacylglycerols	TG(16:0_38:2)	0.09	0.165	0.096	0.117	0.037	0.057	0.045	0.33	0.28	0.049	0.177	0.229	0.333	0.406
triacylglycerols	TG(18:1_36:1)	0.332	0.514	0.387	0.425	0.223	0.411	0.111	0.811	0.829	0.306	0.583	0.539	1.04	1.06
triacylglycerols	TG(18:1_36:2)	0.788	1.15	0.638	0.809	0.236	0.798	0.317	1.84	1.78	0.438	1.18	1.22	2.59	2.32
triacylglycerols	TG(18:1_34:1)	1.03	1.71	0.862	0.963	0.371	1.1	0.28	2.14	2.66	0.509	1.6	1.83	3.03	3.06
triacylglycerols	TG(18:1_36:3)	0.329	0.857	0.417	0.46	0.106	0.646	0.134	1.1	1.38	0.176	0.747	0.978	1.53	1.54
triacylglycerols	TG(18:2_34:1)	0.34	0.841	0.327	0.342	0.069	0.501	0.087	0.846	1.01	0.125	0.611	0.849	1.06	1.23
triacylglycerols	TG(20:2_34:1)	0.092	0.222	0.13	0.149	0.022	0.157	0.0001	0.443	0.417	0.025	0.19	0.33	0.457	0.586
triacylglycerols	TG(18:2_36:1)	0.078	0.252	0.101	0.152	0.073	0.122	0.047	0.384	0.387	0.061	0.214	0.333	0.462	0.502
triacylglycerols	TG(20:1_34:2)	0.066	0.132	0.088	0.06	0.024	0.0001	0.0001	0.185	0.213	0.0001	0.094	0.195	0.25	0.307
triacylglycerols	TG(20:2_32:0)	0.054	0.097	0.06	0.067	0.033	0.065	0.049	0.123	0.2	0.054	0.065	0.133	0.137	0.203
triacylglycerols	TG(16:0_36:2)	0.508	0.94	0.34	0.396	0.14	0.508	0.161	1.22	1.1	0.175	0.736	0.918	1.34	1.54
triacylglycerols	TG(18:2_36:2)	0.199	0.546	0.199	0.315	0.07	0.397	0.09	0.815	0.771	0.088	0.454	0.598	1.03	0.987
triacylglycerols	TG(20:1_34:1)	0.161	0.184	0.187	0.154	0.024	0.161	0.021	0.412	0.445	0.053	0.176	0.313	0.466	0.468
triacylglycerols	TG(18:1_36:4)	0.252	0.486	0.238	0.339	0.153	0.34	0.229	0.547	0.531	0.222	0.354	0.418	0.575	0.662
triacylglycerols	TG(20:4_36:2)	0.087	0.151	0.072	0.099	0.04	0.121	0.05	0.332	0.337	0.045	0.102	0.195	0.23	0.407
triacylglycerols	TG(18:0_34:2)	0.075	0.209	0.077	0.075	0.021	0.113	0.0001	0.252	0.198	0.036	0.178	0.159	0.255	0.272
triacylglycerols	TG(18:1_32:1)	0.239	0.59	0.135	0.251	0.152	0.221	0.178	0.576	0.596	0.217	0.368	0.39	0.576	0.592
triacylglycerols	TG(20:2_34:2)	0.035	0.106	0.064	0.085	0.0001	0.088	0.0001	0.18	0.19	0.01	0.072	0.227	0.196	0.255

## Sheet: 3A
		PN19	MES83	U251	TRP
S1		0.869966	2.02054	2.52355	1.04404
S2		0.927293	1.88276	2.33128	1.95744
S3		0.942563	1.91927	2.22945	1.51073
S4		0.994883	1.93944	2.21271	1.41635
S5		0.961688	1.93128	2.25118
S6		1.00749	1.94159	2.40488

## Sheet: 3C&4C
			s1				s2				s3
			negative	positive	total	% dead	negative	positive	total	% dead	negative	positive	total	% dead
		Control	150	8	158	5.06329	158	4	162	2.46914	161	4	165	2.42424
		Control+ATGL	175	4	179	2.23464	155	10	165	6.06061	188	9	197	4.56853
		Palmitate	129	6	135	4.44444	115	5	120	4.16667	109	6	115	5.21739
		Palmitate+ATGL	95	6	101	5.94059	86	6	92	6.52174	105	8	113	7.07965
		Oleic	165	6	171	3.50877	149	7	156	4.48718	151	7	158	4.43038
		Oleic+ATGL	154	10	164	6.09756	160	12	172	6.97674	166	9	175	5.14286
		Linoleic	98	15	113	13.2743	105	12	117	10.2564	92	16	108	14.8148
		Linoleic+ATGL	151	9	160	5.625	146	8	154	5.19481	155	9	164	5.4878

## Sheet: 3D&4i
			s1				s2				s3
			negative	positive	total	% dead	negative	positive	total	% dead	negative	positive	total	% dead	avg	SD
		Control	116	13	129	10.0775	131	9	140	6.42857	111	11	122	9.01639	8.50749	1.87695
		PA	88	14	102	13.7255	101	18	119	15.1261	96	17	113	15.0442	14.6319	0.786064
		OA	132	22	154	14.2857	128	28	156	17.9487	121	24	145	16.5517	16.2621	1.8486
		LA	93	21	114	18.4211	103	35	138	25.3623	109	33	142	23.2394	22.3409	3.55679
	ATGLstatin	Control	123	15	138	10.8696	119	19	138	13.7681	111	14	125	11.2	11.9459	1.58672
		PA	97	22	119	18.4874	92	21	113	18.5841	99	18	117	15.3846	17.4854	1.81994
		OA	161	22	183	12.0219	141	26	167	15.5689	123	18	141	12.766	13.4522	1.87044
		LA	142	19	161	11.8012	119	23	142	16.1972	125	22	147	14.966	14.3215	2.26774

## Sheet: 3E&4F
			s1				s2				s3
			negative	positive	total	% dead	negative	positive	total	% dead	negative	positive	total	% dead	avg	SD
		Control	90	5	95	5.26316	92	6	98	6.12245	101	8	109	7.33945	6.24169	1.04327
		ATGLstatin	85	7	92	7.6087	96	8	104	7.69231	94	6	100	6	7.10033	0.953834
		Palmiate	65	9	74	12.1622	69	11	80	13.75	72	12	84	14.2857	13.3993	1.10436
		ATGLstatin	71	9	80	11.25	65	11	76	14.4737	62	9	71	12.6761	12.7999	1.61541
	OA	Control	102	5	107	4.6729	112	8	120	6.66667	105	8	113	7.07965	6.13974	1.28699
		ATGLstatin	99	5	104	4.80769	98	6	104	5.76923	96	7	103	6.79612	5.79101	0.994391
	LA	Control	61	14	75	18.6667	56	12	68	17.6471	54	12	66	18.1818	18.1652	0.510007
		ATGLstatin	75	7	82	8.53659	82	9	91	9.89011	71	10	81	12.3457	10.2575	1.93093

## Sheet: 3F
			S1				S2				S3
			Viable	Dead	Total	% Dead	Viable	Dead	Total	% Dead	Viable	Dead	Total	% Dead
	PN19	Control	83	2	85	2.35294	82	2	84	2.38095	85	3	88	3.40909
		PA	73	4	77	5.19481	85	4	89	4.49438	79	3	82	3.65854
		OA	72	3	75	4	79	4	83	4.81928	69	4	73	5.47945
		LA	90	4	94	4.25532	80	5	85	5.88235	93	5	98	5.10204

[truncated: 27 more sheets: 3G&4B, 3H &4H, 3i&4E, 3J, 3K, 3L, 4A, 4D, 4G, 5A&7D, 5B_TRP, 5B_u251, 5C, 6D, 7A, 7B, 7C, 7D, 7F & G, 8B-D …]
